# Supplementary material for: Identification of signaling pathways, matrix-digestion enzymes, and motility components controlling Vibrio cholerae biofilm dispersal
Source: PubMed Central journal article supplement (PMC7768729; doi:10.1073/pnas.2021166117), 2020-12-07
Supplement: pnas.2021166117.sapp.pdf [file pnas.2021166117.sapp.pdf]

## Supplementary Information for

Identification of signaling pathways, matrix-digestion enzymes, and motility components controlling *Vibrio cholerae* biofilm dispersal

Andrew A. Bridges<sup>1,2</sup>, Chenyi Fei<sup>1</sup>, Bonnie L. Bassler<sup>1,2\*</sup>

<sup>1</sup>Department of Molecular Biology, Princeton University, Princeton, NJ 08544, USA

<sup>2</sup>The Howard Hughes Medical Institute, Chevy Chase, MD 20815, USA.

\*Corresponding author: Bonnie L. Bassler

Email: [bbassler@princeton.edu](mailto:bbassler@princeton.edu)

### This PDF file includes:

Supplementary text  
Figures S1 to S4  
Tables S1 to S2  
Legends for Movie S1  
SI References

### Other supplementary materials for this manuscript include the following:

Movie S1

## Supplementary Information Text

### DbfS is not equivalent to PhoQ

In *Escherichia coli*, low  $Mg^{2+}$  and cationic peptides activate PhoQ kinase activity (1). Sequence alignment of the DbfS sensory domain with that from PhoQ of *E. coli*, *Salmonella enterica*, and *Pseudomonas aeruginosa* revealed that DbfS lacks all of the key residues involved in  $Mg^{2+}$  binding (Fig. S2A) (2). To test if  $Mg^{2+}$  alters DfbS activity, we measured the *V. cholerae* biofilm lifecycle in response to low  $Mg^{2+}$  conditions in WT *V. cholerae* and in the  $\Delta dbfR$  mutant. If, analogous to PhoQ, DfbS kinase activity is activated by low  $Mg^{2+}$ , when  $Mg^{2+}$  is limiting, WT *V. cholerae* should exhibit an altered biofilm dispersal phenotype while the  $\Delta dbfR$  mutant would be impervious to  $Mg^{2+}$  changes (1). Fig. S2B shows that  $Mg^{2+}$  limitation does indeed inhibit *V. cholerae* biofilm dispersal, however, inhibition occurs in *both* the WT and the  $\Delta dbfR$  strains.  $Mg^{2+}$  limitation did not alter *vpsL-lux* expression in either strain (Fig. S2C). Thus,  $Mg^{2+}$  does not control DfbS activity. We obtained the same results following exogenous addition of the cationic peptide C18G (Fig. S2D). Together, these results demonstrate that DfbS does not respond to the ligands that control PhoQ activity.

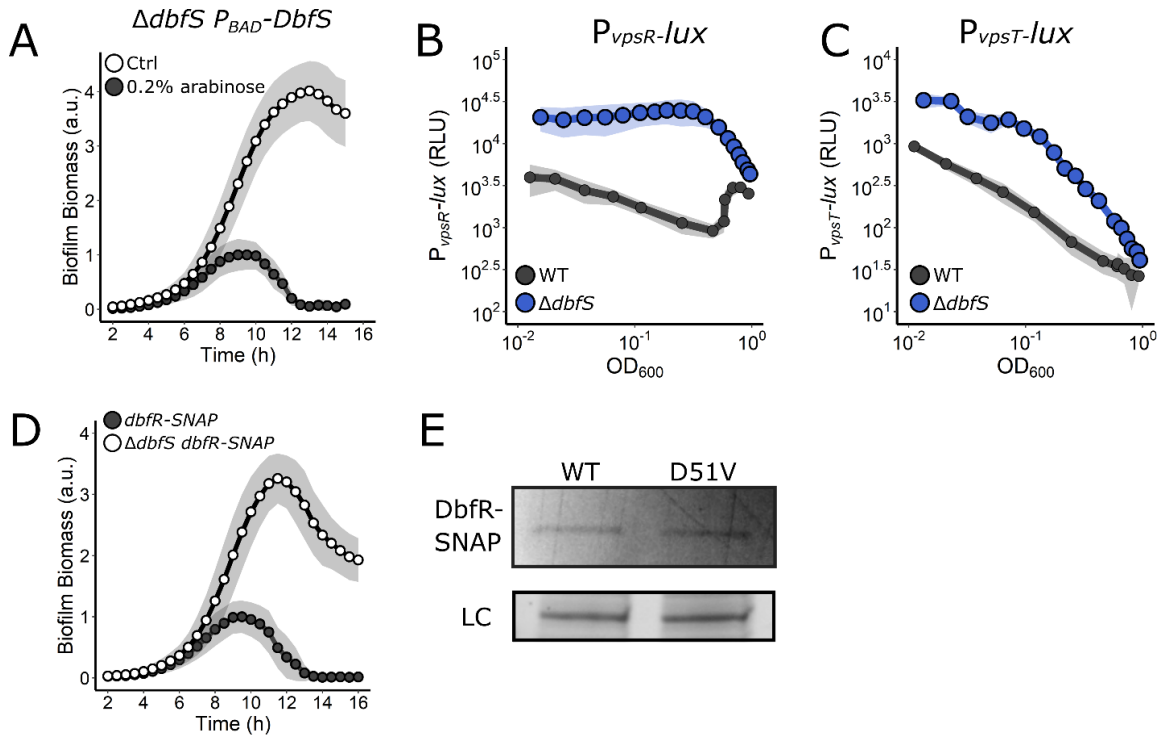

**Fig. S1. Complementation, functional tagging, and mutagenesis of the DbfS-DbfR two-component system.** (A) Quantitation of biofilm biomass over time measured by time-lapse microscopy for the  $\Delta dbfS P_{BAD}\text{-}dbfS$  strain following addition of water (Ctrl) or 0.2% arabinose. (B)  $P_{vpsR}\text{-}lux$  and (C)  $P_{vpsT}\text{-}lux$  output for WT and the  $\Delta dbfS$  strain over the growth curve. (D) As in A for SNAP-tagged DbfR in the WT and  $\Delta dbfS$  strains. (E) Top panel: representative in-gel SDS-PAGE fluorescence following electrophoresis of *V. cholerae* cell lysates containing WT DbfS-SNAP or DbfS<sup>D51V</sup>-SNAP that had been incubated with SNAP-Cell TMR Star. Bottom panel: Coomassie stained loading control (LC). For all biofilm measurements,  $N = 3$  biological and  $N = 3$  technical replicates,  $\pm$  SD (shaded). a.u., arbitrary unit. For *lux* measurements,  $N = 3$  biological replicates,  $\pm$  SD (shaded). RLU, relative light units.

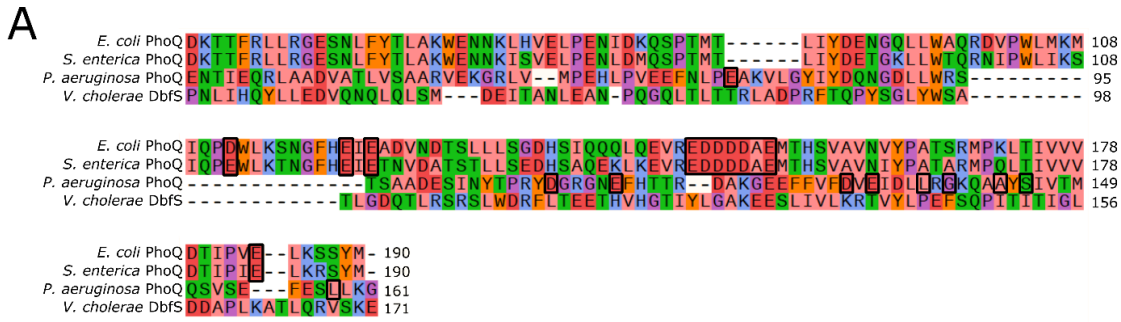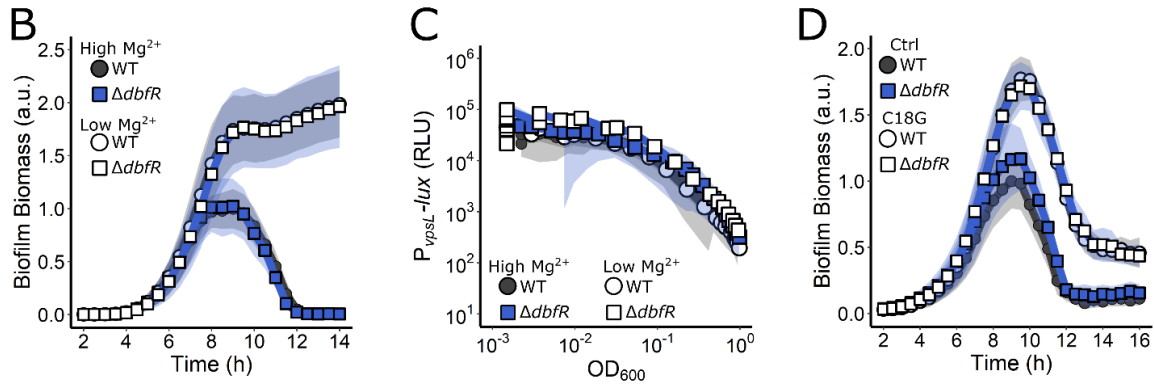

**Fig. S2. DbfS is not functionally equivalent to PhoQ.** (A) Alignment of the sensory domains of PhoQ from *E. coli*, *S. enterica*, and *P. aeruginosa* against that of *V. cholerae* DbfS. Black boxes indicate residues involved in Mg<sup>2+</sup> binding in PhoQ. (B) Quantitation of biofilm biomass over time measured by time-lapse microscopy in high magnesium (10 mM) and limiting magnesium (10 μM) conditions for WT *V. cholerae* and the  $\Delta dbfR$  strain. (C) The corresponding  $P_{vpsL-lux}$  outputs for strains and growth conditions in B over the growth curve. (D) As in B except following the addition of water or 5 μg/mL C18G. In all cases,  $N = 3$  biological and  $N = 3$  technical replicates,  $\pm$  SD (shaded). a.u., arbitrary unit. For  $vpsL-lux$  measurements,  $N = 3$  biological replicates,  $\pm$  SD (shaded). RLU, relative light units.

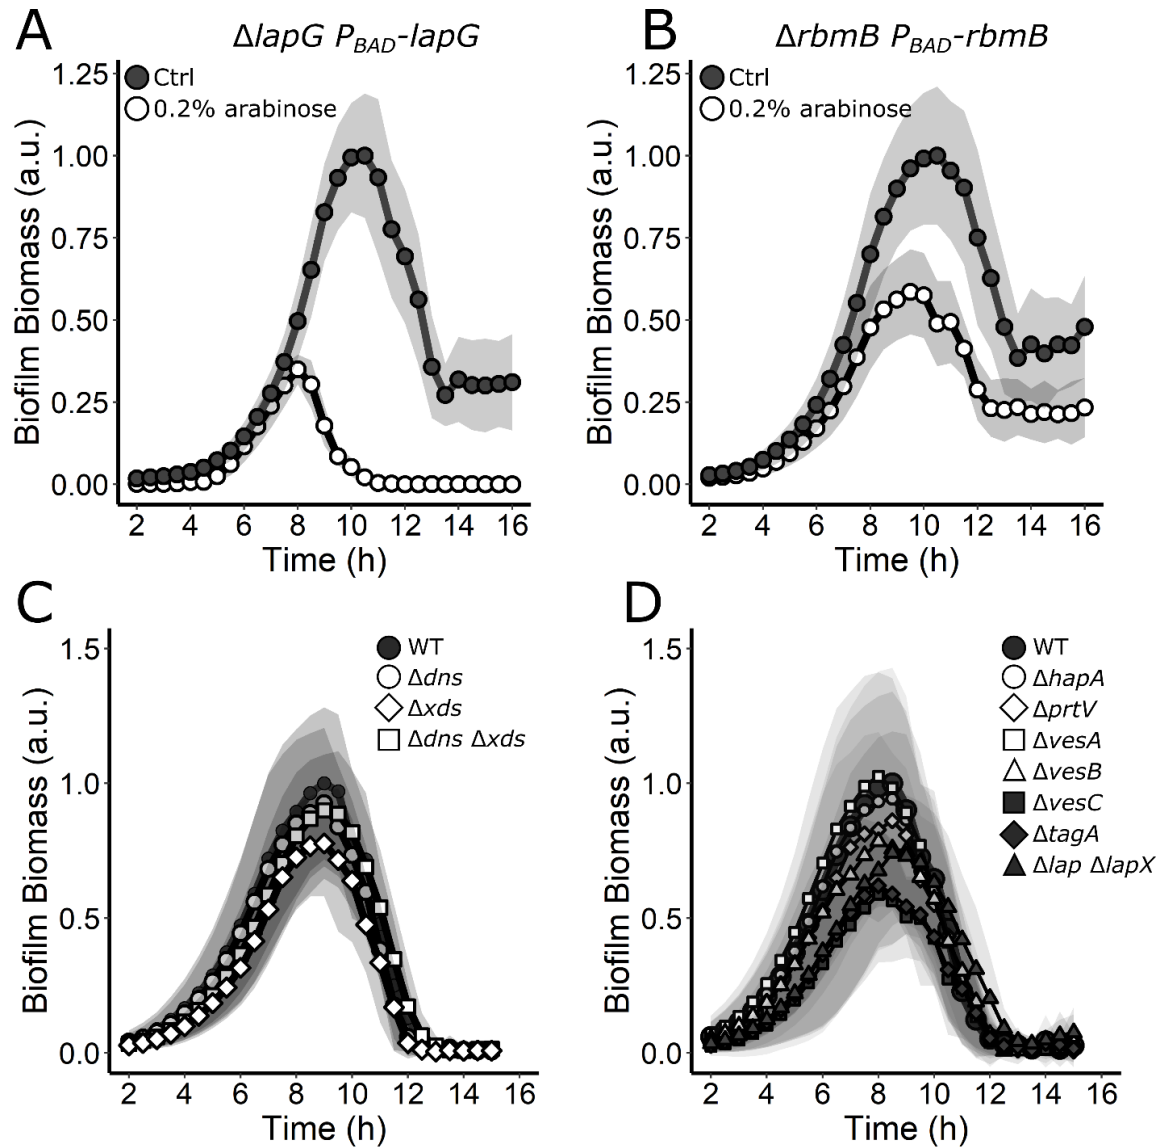

**Fig. S3. Introduction of *lapG* and *rbmB* complements the  $\Delta lapG$  and  $\Delta rbmB$  biofilm defects, respectively, and assessment of the roles of extracellular DNAses and secreted proteases in *V. cholerae* biofilm dispersal.** (A) Quantitation of biofilm biomass over time measured by time-lapse microscopy for the  $\Delta lapG P_{BAD-lapG}$  strain following addition of water (Ctrl) or 0.2% arabinose. (B) As in A, but for the  $\Delta rbmB P_{BAD-rbmB}$  strain. (C) Quantitation of biofilm biomass over time measured by time-lapse microscopy for WT *V. cholerae* and mutants lacking the designated DNAses. (D) Quantitation of biofilm biomass over time measured by time-lapse microscopy for WT *V. cholerae* and mutants lacking the designated proteases. In all cases,  $N = 3$  biological and  $N = 3$  technical replicates,  $\pm$  SD (shaded). a.u., arbitrary unit.

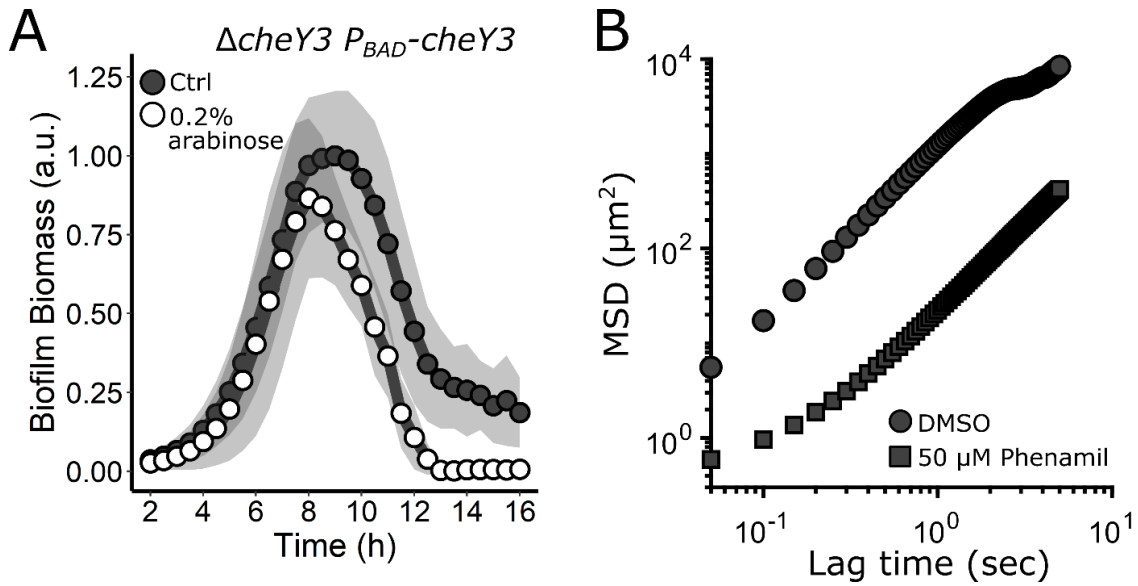

**Fig. S4. Complementation of the  $\Delta cheY3$  mutant and phenamil inhibition of *V. cholerae* motility.** (A) Quantitation of biofilm biomass over time measured by time-lapse microscopy for the  $\Delta cheY3 P_{BAD}\text{-}cheY3$  strain following addition of water (Ctrl) or 0.2% arabinose. In all cases,  $N = 3$  biological and  $N = 3$  technical replicates,  $\pm$  SD (shaded). a.u., arbitrary unit. (B) Mean squared displacement (MSD) of cell trajectories versus lag time for WT *V. cholerae* treated with DMSO solvent or 50  $\mu\text{M}$  phenamil.

**Table S1. Strains used in this study.**

| Strain Number | Genotype                                                            | Plasmid                                              | Antibiotic Resistance | Parent     |
|---------------|---------------------------------------------------------------------|------------------------------------------------------|-----------------------|------------|
| BB_Vc_0090    | WT O1 El Tor biotype C6706str2                                      | -                                                    | Sm                    | -          |
| AB_Vc_761     | $\Delta vlc1807::Cm^R$ (Referred to as WT)                          | -                                                    | Sm, Cm                | BB_Vc_0090 |
| AB_Vc_705     | $\Delta cheY \Delta vlc1807::Cm^R$                                  | -                                                    | Sm, Cm                | BB_Vc_0090 |
| AB_Vc_708     | $\Delta bipA \Delta vlc1807::Cm^R$                                  | -                                                    | Sm, Cm                | BB_Vc_0090 |
| AB_Vc_839     | $\Delta mbaA \Delta vlc1807::Cm^R$                                  | -                                                    | Sm, Cm                | BB_Vc_0090 |
| AB_Vc_711     | $\Delta potD1 \Delta vlc1807::Cm^R$                                 | -                                                    | Sm, Cm                | BB_Vc_0090 |
| AB_Vc_757     | $\Delta lapG \Delta vlc1807::Cm^R$                                  | -                                                    | Sm, Cm                | BB_Vc_0090 |
| AB_Vc_758     | $\Delta rocS \Delta vlc1807::Cm^R$                                  | -                                                    | Sm, Cm                | BB_Vc_0090 |
| AB_Vc_775     | $\Delta dbfS \Delta vlc1807::Cm^R$                                  | -                                                    | Sm, Cm                | BB_Vc_0090 |
| AB_Vc_777     | $\Delta cdgI \Delta vlc1807::Cm^R$                                  | -                                                    | Sm, Cm                | BB_Vc_0090 |
| AB_Vc_778     | $\Delta cdgG \Delta vlc1807::Cm^R$                                  | -                                                    | Sm, Cm                | BB_Vc_0090 |
| AB_Vc_485     | $\Delta rbmB \Delta vlc1807::Kan^R$                                 | -                                                    | Sm, Kan               | BB_Vc_0090 |
| AB_Vc_801     | $\Delta vlc1807::Kan^R$                                             | pEV5143- <i>P<sub>vpsL</sub>-lux::Cm<sup>R</sup></i> | Sm, Cm, Kan           | AB_Vc_479  |
| AB_Vc_825     | $\Delta cheY \Delta vlc1807::Kan^R$                                 | pEV5143- <i>P<sub>vpsL</sub>-lux::Cm<sup>R</sup></i> | Sm, Cm, Kan           | AB_Vc_705  |
| AB_Vc_829     | $\Delta lapG \Delta vlc1807::Kan^R$                                 | pEV5143- <i>P<sub>vpsL</sub>-lux::Cm<sup>R</sup></i> | Sm, Cm, Kan           | AB_Vc_757  |
| AB_Vc_802     | $\Delta rbmB \Delta vlc1807::Kan^R$                                 | pEV5143- <i>P<sub>vpsL</sub>-lux::Cm<sup>R</sup></i> | Sm, Cm, Kan           | AB_Vc_485  |
| AB_Vc_815     | $\Delta dbfS \Delta vlc1807::Kan^R$                                 | pEV5143- <i>P<sub>vpsL</sub>-lux::Cm<sup>R</sup></i> | Sm, Cm, Kan           | AB_Vc_775  |
| AB_Vc_936     | WT                                                                  | pBBR1- <i>P<sub>vpsR</sub>-lux::Cm<sup>R</sup></i>   | Sm, Cm                | BB_Vc_0090 |
| AB_Vc_938     | WT                                                                  | pBBR1- <i>P<sub>vpsT</sub>-lux::Cm<sup>R</sup></i>   | Sm, Cm                | BB_Vc_0090 |
| AB_Vc_942     | $\Delta dbfS \Delta vlc1807::Kan^R$                                 | pBBR1- <i>P<sub>vpsR</sub>-lux::Cm<sup>R</sup></i>   | Sm, Cm, Kan           | AB_Vc_815  |
| AB_Vc_944     | $\Delta dbfS \Delta vlc1807::Kan^R$                                 | pBBR1- <i>P<sub>vpsT</sub>-lux::Cm<sup>R</sup></i>   | Sm, Cm, Kan           | AB_Vc_815  |
| AB_Vc_773     | $\Delta dbfR \Delta vlc1807::Cm^R$                                  | -                                                    | Sm, Cm                | BB_Vc_0090 |
| AB_Vc_701     | $\Delta dbfRS \Delta vlc1807::Cm^R$                                 | -                                                    | Sm, Cm                | BB_Vc_0090 |
| AB_Vc_788     | $\Delta dbfR^{DS1V} \Delta vlc1807::Cm^R$                           | -                                                    | Sm, Cm                | BB_Vc_0090 |
| AB_Vc_891     | $\Delta dbfR^{DS1V} \Delta dbfS \Delta vlc1807::Kan^R$              | -                                                    | Sm, Kan               | BB_Vc_0090 |
| AB_Vc_863     | $\Delta dbfR-SNAP \Delta dbfS \Delta vlc1807::P_{BAD}-dbfS::Spec^R$ | -                                                    | Sm, Spec              | BB_Vc_0090 |
| AB_Vc_865     | $\Delta dbfS \Delta vlc1807::P_{BAD}-dbfS::Spec^R$                  | -                                                    | Sm, Spec              | BB_Vc_0090 |
| AB_Vc_879     | $\Delta dbfR-SNAP \Delta vlc1807::Kan^R$                            | -                                                    | Sm, Kan               | BB_Vc_0090 |
| AB_Vc_881     | $\Delta dbfR^{DS1V}-SNAP \Delta vlc1807::Kan^R$                     | -                                                    | Sm, Kan               | BB_Vc_0090 |
| AB_Vc_859     | $\Delta lapG \Delta vlc1807::P_{BAD}-lapG::Spec^R$                  | -                                                    | Sm, Spec              | AB_Vc_757  |
| AB_Vc_898     | $\Delta lapD \Delta vlc1807::Kan^R$                                 | -                                                    | Sm, Kan               | BB_Vc_0090 |
| AB_Vc_900     | $\Delta lapD \Delta lapG \Delta vlc1807::Kan^R$                     | -                                                    | Sm, Kan               | BB_Vc_0090 |
| AB_Vc_948     | $\Delta lapG \Delta rbmB \Delta vlc1807::Kan^R$                     | -                                                    | Sm, Kan               | AB_Vc_182  |
| AB_Vc_862     | $\Delta rbmB \Delta vlc1807::P_{BAD}-rbmB::Spec^R$                  | -                                                    | Sm, Spec              | AB_Vc_485  |
| BB_Vc_0252    | $\Delta dns$                                                        | -                                                    | Sm                    | BB_Vc_0090 |
| BB_Vc_0253    | $\Delta xds$                                                        | -                                                    | Sm                    | BB_Vc_0090 |
| BB_Vc_0254    | $\Delta dns \Delta xds$                                             | -                                                    | Sm                    | BB_Vc_0090 |
| MJ_552        | $\Delta hapA \Delta vlc1807::Kan^R$                                 | -                                                    | Sm, Kan               | BB_Vc_0090 |

|           |                                                                        |   |          |            |
|-----------|------------------------------------------------------------------------|---|----------|------------|
| MJ_553    | $\Delta prtV \Delta vc1807::Kan^R$                                     | - | Sm, Kan  | BB_Vc_0090 |
| MJ_554    | $\Delta vesA \Delta vc1807::Kan^R$                                     | - | Sm, Kan  | BB_Vc_0090 |
| MJ_555    | $\Delta vesB \Delta vc1807::Kan^R$                                     | - | Sm, Kan  | BB_Vc_0090 |
| MJ_562    | $\Delta vesC \Delta vc1807::Kan^R$                                     | - | Sm, Kan  | BB_Vc_0090 |
| MJ_561    | $\Delta lap \Delta lapX lacZ::Ptac-mKO \Delta vc1807::Kan^R$           | - | Sm, Kan  | BB_Vc_0090 |
| AB_Vc_792 | $\Delta tagA \Delta vc1807::Cm^R$                                      | - | Sm, Cm   | BB_Vc_0090 |
| AB_Vc_857 | $\Delta cheY \Delta vc1807::P_{BAD-cheY3}::Spec^R$                     | - | Sm, Spec | AB_Vc_705  |
| AB_Vc_715 | $cheY^{D16K, Y109W} \Delta vc1807::Kan^R$                              | - | Sm, Kan  | BB_Vc_0090 |
| AB_Vc_732 | $\Delta vpsL \Delta vc1807::Ptac-mScarletI::Spec^R$                    | - | Sm, Spec | BB_Vc_0090 |
| AB_Vc_735 | $\Delta cheY \Delta vpsL \Delta vc1807::Ptac-mScarletI::Spec^R$        | - | Sm, Spec | AB_Vc_705  |
| AB_Vc_745 | $cheY^{D16K, Y109W} \Delta vpsL \Delta vc1807::Ptac-mScarletI::Spec^R$ | - | Sm, Spec | AB_Vc_715  |



**Table S2. DNA oligonucleotides and gene fragments used in this study.**

| Oligo # | Name                   | Purpose                                                | Direction | 5' to 3' Sequence                                                                                                                                                                                                                                                                                                                                                                                                                                                                                                                                    |
|---------|------------------------|--------------------------------------------------------|-----------|------------------------------------------------------------------------------------------------------------------------------------------------------------------------------------------------------------------------------------------------------------------------------------------------------------------------------------------------------------------------------------------------------------------------------------------------------------------------------------------------------------------------------------------------------|
| 551     | <i>cheY_3000up</i>     | Cloning at <i>cheY3</i> locus                          | F         | CAAGCGTTACAACCTCGCAGCCTAG                                                                                                                                                                                                                                                                                                                                                                                                                                                                                                                            |
| 552     | <i>cheY_3000down</i>   | Cloning at <i>cheY3</i> locus                          | R         | CACAACCAGACCTACGCGCTGAC                                                                                                                                                                                                                                                                                                                                                                                                                                                                                                                              |
| 553     | <i>cheY_100up</i>      | Cloning at <i>cheY3</i> locus                          | F         | GGTGAGGTAAGTGGAGTTAGTGAATCTC                                                                                                                                                                                                                                                                                                                                                                                                                                                                                                                         |
| 554     | <i>cheY_100down</i>    | Cloning at <i>cheY3</i> locus                          | R         | CACTGAAGCGCTCATCAATCTGAAAG                                                                                                                                                                                                                                                                                                                                                                                                                                                                                                                           |
| 555     | <i>cheY_B</i>          | <i>cheY3</i> deletion                                  | R         | GAGCACCTTTTGCCGCGAGCAAAAAGCCTGAGTTTGAGATCAGT<br>GATATTTAGTCATTCC                                                                                                                                                                                                                                                                                                                                                                                                                                                                                     |
| 556     | <i>cheY_C</i>          | <i>cheY3</i> deletion                                  | F         | GGAATGACTAAATATCACTGATCTCAAACCTCAGGCTTTTGCT<br>GCGGCAAAAAGGTGCTC                                                                                                                                                                                                                                                                                                                                                                                                                                                                                     |
| 561     | <i>cheY_2700up</i>     | Cloning at <i>cheY3</i> locus                          | F         | GATGACCGTGTGCTGATTTGCAATCGAG                                                                                                                                                                                                                                                                                                                                                                                                                                                                                                                         |
| 562     | <i>cheY_2700down</i>   | Cloning at <i>cheY3</i> locus                          | R         | CTTCGGTGCTAACCAGTTTGTAAAGTAGAAC                                                                                                                                                                                                                                                                                                                                                                                                                                                                                                                      |
| 563     | <i>cheY_up_R</i>       | Cloning at <i>cheY3</i> locus                          | R         | GAGTTTGAGATCAGTGATATTTAGTCATTCCGAGTCC                                                                                                                                                                                                                                                                                                                                                                                                                                                                                                                |
| 564     | <i>cheY_down_R</i>     | Cloning at <i>cheY3</i> locus                          | R         | GGCTTTTGCTGCGGCAAAAAGGTGCTCTATTC                                                                                                                                                                                                                                                                                                                                                                                                                                                                                                                     |
| 566     | <i>cheY_D16K_Y109W</i> | Gblock for introduction of <i>cheY3</i> point mutation | F         | GTAAAGTTCTTGACTCGGAATGACTAAATATCACTGATCTC<br>AAACTCAGTGGAGGCAATTTTGAATAAAAAACATGAAGATCCT<br>TATTGTTGATAAGTTTCAACAATGCGCCGAATCGTTAAAAA<br>CCTACTTCGAGATCTGGGGTTCAATAACACGCAGGAAGCGGA<br>CGATGGCCTAACGGCATTGCCTATGCTCAAGAAAGGTGATTT<br>TGACTTTGTAGTCACAGACTGGAATATGCCCGGTATGCAAGG<br>TATTGACTTGCTTAAAAATATCCGTGCCGACGAAGAAGTGA<br>GCACCTGCCTGTACTAATGATCACAGCAGAAAGCCAAAACGTGA<br>GCAAATCATCGAAGCCGCTCAAGCAGGCGTGAATGGTTGGAT<br>CGTAAAACCATTTACCGCTGCTACGCTTAAAGAAAAATTAGA<br>CAAAATTTTGTAGCGTTTATAAGGCTTTTGCTGCGGCAAAAAG<br>GTGCTCTATTCACACGCGCAAAAAG |
| 545     | <i>bipA_3000up</i>     | Cloning at <i>bipA</i> locus                           | F         | GCTGCGTGAGCAGTTGTAATCGAG                                                                                                                                                                                                                                                                                                                                                                                                                                                                                                                             |
| 546     | <i>bipA_3000down</i>   | Cloning at <i>bipA</i> locus                           | R         | CAACGCTTTGTAGTTCGGGATTAGCATATA                                                                                                                                                                                                                                                                                                                                                                                                                                                                                                                       |
| 547     | <i>bipA_100up</i>      | Cloning at <i>bipA</i> locus                           | F         | GTCGACGATTTTCAGCGCGACAGATC                                                                                                                                                                                                                                                                                                                                                                                                                                                                                                                           |
| 548     | <i>bipA_100down</i>    | Cloning at <i>bipA</i> locus                           | R         | GAGGTATTTCTGGATAGTGGCATAGC                                                                                                                                                                                                                                                                                                                                                                                                                                                                                                                           |
| 549     | <i>bipA_B</i>          | <i>bipA</i> deletion                                   | R         | GATGACTTATCTTACCAAACGAAAGTCAGTGACGGGGTTGC<br>TTCATTTTTTCATTGAGGCTG                                                                                                                                                                                                                                                                                                                                                                                                                                                                                   |
| 550     | <i>bipA_C</i>          | <i>bipA</i> deletion                                   | F         | CAGCCTCAATGAAAAAGTGAAGCAAACCCGCTCACTGACTTT<br>CGTTTGGTAAGATAAGTCATC                                                                                                                                                                                                                                                                                                                                                                                                                                                                                  |
| 567     | <i>bipA_2700up</i>     | Cloning at <i>bipA</i> locus                           | R         | CAGTGACTCGTCCAAAATGAGCACTG                                                                                                                                                                                                                                                                                                                                                                                                                                                                                                                           |
| 568     | <i>bipA_2700down</i>   | Cloning at <i>bipA</i> locus                           | R         | GATCTAAATCGCCACTGATCCCATCAAG                                                                                                                                                                                                                                                                                                                                                                                                                                                                                                                         |
| 571     | <i>mbaA_3000up</i>     | Cloning at <i>mbaA</i> locus                           | F         | GCGCGCTAATCTGAACTCAACCCATAAG                                                                                                                                                                                                                                                                                                                                                                                                                                                                                                                         |
| 572     | <i>mbaA_2700up</i>     | Cloning at <i>mbaA</i> locus                           | F         | CGTTAGCATTCCACGCGGTCAGTTAG                                                                                                                                                                                                                                                                                                                                                                                                                                                                                                                           |
| 711     | <i>mbaA_KO2_B</i>      | <i>mbaA</i> deletion                                   | R         | GGAGGCATGAAGCCATGGGGAGATCTCGCTATGGTTTAGCTT<br>CATATTGGTAAGTCACACTG                                                                                                                                                                                                                                                                                                                                                                                                                                                                                   |
| 712     | <i>mbaA_KO2_C</i>      | <i>mbaA</i> deletion                                   | F         | CAGTGTGACTTACCAATATGAAGCTAAACCATAGCGAGATCT<br>CCCCATGGCTTCATGCCTCC                                                                                                                                                                                                                                                                                                                                                                                                                                                                                   |
| 575     | <i>mbaA_2700down</i>   | Cloning at <i>mbaA</i> locus                           | R         | GATCTCATGACGCGCCTGACGGTATTTAAG                                                                                                                                                                                                                                                                                                                                                                                                                                                                                                                       |
| 576     | <i>mbaA_3000down</i>   | Cloning at <i>mbaA</i> locus                           | R         | CATCGTTTCGCGATAGTGGGAAATTCAATAAAATG                                                                                                                                                                                                                                                                                                                                                                                                                                                                                                                  |
| 577     | <i>mbaA_100up</i>      | Cloning at <i>mbaA</i> locus                           | F         | GAAACCTGACATTGCCGAATCAATGC                                                                                                                                                                                                                                                                                                                                                                                                                                                                                                                           |

|     |                        |                               |   |                                                                       |
|-----|------------------------|-------------------------------|---|-----------------------------------------------------------------------|
| 578 | <i>mbaA</i> _100down   | Cloning at <i>mbaA</i> locus  | R | CCTGCTTCCAATCCGACATAATACTCTGC                                         |
| 539 | <i>potD1</i> _3000up   | Cloning at <i>potD1</i> locus | F | CTGGAATCCGGTATGTGTGTGATGGTTAG                                         |
| 540 | <i>potD1</i> _3000down | Cloning at <i>potD1</i> locus | R | AGAGCGACTAGGTGTTATTGAACTTGGG                                          |
| 541 | <i>potD1</i> _100up    | Cloning at <i>potD1</i> locus | F | CTAAGAAAAGCATCAAATAGGCAGCCATTG                                        |
| 542 | <i>potD1</i> _100down  | Cloning at <i>potD1</i> locus | R | GATCTGGAAGAGATTAAGGCGCTCTC                                            |
| 543 | <i>potD1</i> _B        | <i>potD1</i> deletion         | R | GGTGGCTTTTAAATGGGAGATAAAAGGCTACGTTCCCATAGT<br>GTATAGAAAGAACC          |
| 544 | <i>potD1</i> _C        | <i>potD1</i> deletion         | F | GGTTCTTTCTATACACTATGGGAACGTAGCCTTTTATCTCCCA<br>TTAAAAAGCCACC          |
| 569 | <i>potD1</i> _2700up   | Cloning at <i>potD1</i> locus | F | CTGATGATTATTGGTACGAGTTTTCTGACTCGTG                                    |
| 570 | <i>potD1</i> _2700down | Cloning at <i>potD1</i> locus | R | CGATAATCCAAATCAAATCGAGGTGCAGG                                         |
| 602 | <i>lapG</i> _3000up    | Cloning at <i>lapG</i> locus  | F | CAAACAATTACCCGGTTATTGGGGATG                                           |
| 603 | <i>lapG</i> _2700up    | Cloning at <i>lapG</i> locus  | F | GCATTCGTCAAAGTGCTCGATATTCATC                                          |
| 604 | <i>lapG</i> _100up     | Cloning at <i>lapG</i> locus  | F | GATCATTCCGGGAATGACCGCTTC                                              |
| 605 | <i>lapG</i> _B         | Cloning at <i>lapG</i> locus  | R | CGACTAGTTGTTTGTATAGCGTCATAGTGCAGGGCGGGCTAT<br>TCCCTCAGCGCATTGCTTTG    |
| 606 | <i>lapG</i> _C         | <i>lapG</i> deletion          | F | CAAAGCAATGCGCTGAGGGAATAGCCCGCCCTGCACTATGAC<br>GCTATACAAAACAAGTAGTCG   |
| 607 | <i>lapG</i> _100down   | <i>lapG</i> deletion          | R | GTGTTGTTGACTTCAGAGCGTTGTTG                                            |
| 608 | <i>lapG</i> _2700down  | Cloning at <i>lapG</i> locus  | R | GTCCAGCCATTAACCAGATCAACAC                                             |
| 609 | <i>lapG</i> _3000down  | Cloning at <i>lapG</i> locus  | R | CAGCGGTACTGGAATTGTCCTTGC                                              |
| 774 | <i>lapD</i> _3000up    | Cloning at <i>lapD</i> locus  | F | CGCGAATACAAGAAGCGATCATGCAG                                            |
| 775 | <i>lapD</i> _2700up    | Cloning at <i>lapD</i> locus  | F | GCAAACCTCTGCTTAAGCTCAAGATACTTGC                                       |
| 776 | <i>lapD</i> _100up     | Cloning at <i>lapD</i> locus  | F | CAATTGGCTGGGGACTCTTCGAGAC                                             |
| 777 | <i>lapD</i> _B         | <i>lapD</i> deletion          | R | GTATCTTGCATGCCTCTGACCTTGGAGTGCCTACTCATCATAG<br>CTAAC                  |
| 778 | <i>lapD</i> _C         | <i>lapD</i> deletion          | F | GTTAGCTATGATGAGTAGGCACTCCAAGTTCAGAGGCATGCA<br>AGATAC                  |
| 779 | <i>lapD</i> _100down   | Cloning at <i>lapD</i> locus  | R | GTAAGCCGTTGATCAGTGCTTCAGGAG                                           |
| 780 | <i>lapD</i> _2700down  | Cloning at <i>lapD</i> locus  | R | CTAACTACGCGCAGTATGTTGAGTTACAAGCG                                      |
| 781 | <i>lapD</i> _3000down  | Cloning at <i>lapD</i> locus  | R | CGTTCAAGCACAAAGCGATATAGACG                                            |
| 784 | <i>lapDG</i> _B        | <i>lapDG</i> deletion         | R | GTATCTTGCATGCCTCTGACCTTGGAGGGCGGGCTATTCCCTC<br>AGCGCATTG              |
| 785 | <i>lapDG</i> _C        | <i>lapDG</i> deletion         | F | CAATGCGCTGAGGGAATAGCCCGCCCTCCAAGTTCAGAGGC<br>ATGCAAGATAC              |
| 610 | <i>rocS</i> _3000up    | Cloning at <i>rocS</i> locus  | F | CAACTCGAGCTTTTCTACCAACCTCAG                                           |
| 611 | <i>rocS</i> _2700up    | Cloning at <i>rocS</i> locus  | F | GCATTTACCGCCCCATTTTCGC                                                |
| 612 | <i>rocS</i> _100up     | Cloning at <i>rocS</i> locus  | F | CTTCAGGCCAAGATCCTTTTCTACTGTG                                          |
| 613 | <i>rocS</i> _B         | <i>rocS</i> deletion          | R | GGTTTCCACCAATCAGAGTAAAATTAACCCCTTAAAATACTA<br>CCAAGTGTCCGTGCGCGACGACG |
| 614 | <i>rocS</i> _C         | <i>rocS</i> deletion          | F | CGTCGTCGCGCACGGACAGTTGGTAGTATTTAAAGGGGTAA<br>TTTACTCTGATTGGTGGAAACC   |
| 615 | <i>rocS</i> _100down   | Cloning at <i>rocS</i> locus  | R | GAAACCGATATAAACCGCATCGGCA                                             |

|     |                                    |                                                                                |   |                                                                                                                                                                                                                                                                                                                                                                                                                                                                                                                                                                                                                                                                                                                    |
|-----|------------------------------------|--------------------------------------------------------------------------------|---|--------------------------------------------------------------------------------------------------------------------------------------------------------------------------------------------------------------------------------------------------------------------------------------------------------------------------------------------------------------------------------------------------------------------------------------------------------------------------------------------------------------------------------------------------------------------------------------------------------------------------------------------------------------------------------------------------------------------|
| 616 | <i>rocS_2700</i> down              | Cloning at <i>rocS</i> locus                                                   | R | GTCACGTTATTAGGCTTGGCGTATTC                                                                                                                                                                                                                                                                                                                                                                                                                                                                                                                                                                                                                                                                                         |
| 617 | <i>rocS_3000</i> down              | Cloning at <i>rocS</i> locus                                                   | R | GCTGTTTGTTCACCTTAGGCTCG                                                                                                                                                                                                                                                                                                                                                                                                                                                                                                                                                                                                                                                                                            |
| 533 | <i>vc1639_3000</i> up              | Cloning at <i>dbfS</i> locus                                                   | F | GCTTAGTGATCGCAGAGCTTGC                                                                                                                                                                                                                                                                                                                                                                                                                                                                                                                                                                                                                                                                                             |
| 534 | <i>vc1639_3000</i> down            | Cloning at <i>dbfS</i> locus                                                   | R | GTGCACTGCATTATTGACTCGCTTAGC                                                                                                                                                                                                                                                                                                                                                                                                                                                                                                                                                                                                                                                                                        |
| 535 | <i>vc1639_100</i> up               | Cloning at <i>dbfS</i> locus                                                   | F | CAAGATTTTGACCGCGATTCCAATAC                                                                                                                                                                                                                                                                                                                                                                                                                                                                                                                                                                                                                                                                                         |
| 536 | <i>vc1639_100</i> down             | Cloning at <i>dbfS</i> locus                                                   | R | GTAGAGTTTCCAAACCTATAGGAG                                                                                                                                                                                                                                                                                                                                                                                                                                                                                                                                                                                                                                                                                           |
| 626 | <i>vc1639_Real_B</i>               | <i>dbfS</i> deletion                                                           | R | CAACTGAAAATCCGTTTTTGCACCGCATTAATTGGCATGCA<br>ACTGATACCCAAG                                                                                                                                                                                                                                                                                                                                                                                                                                                                                                                                                                                                                                                         |
| 627 | <i>vc1639_Real_C</i>               | <i>dbfS</i> deletion                                                           | F | CTTGGGTATCAGTTGCATGCCAATTAATGCGGTGCAAAAAAC<br>GGATTTTCAGTTG                                                                                                                                                                                                                                                                                                                                                                                                                                                                                                                                                                                                                                                        |
| 559 | <i>vc1639_2700</i> up              | Cloning at <i>dbfS</i> locus                                                   | F | CAATCGGTGGTGCACCACTTATCTGAG                                                                                                                                                                                                                                                                                                                                                                                                                                                                                                                                                                                                                                                                                        |
| 560 | <i>vc1639_2700</i> down            | Cloning at <i>dbfS</i> locus                                                   | R | GTTAATGACTTGGAGCAGAATTAAGTTAGCCGC                                                                                                                                                                                                                                                                                                                                                                                                                                                                                                                                                                                                                                                                                  |
| 527 | <i>vc1638_3000</i> up              | Cloning at <i>dbfR</i> locus                                                   | F | GTAGGTCTTCTCGCACTTGTGTTTTG                                                                                                                                                                                                                                                                                                                                                                                                                                                                                                                                                                                                                                                                                         |
| 528 | <i>vc1638_3000</i> down            | Cloning at <i>dbfR</i> locus                                                   | R | GTCCATAACCTTAGCGGAACTCATG                                                                                                                                                                                                                                                                                                                                                                                                                                                                                                                                                                                                                                                                                          |
| 529 | <i>vc1638_100</i> up               | Cloning at <i>dbfR</i> locus                                                   | F | GACAATCAAGTCTTTCGTGTGCAATACAAC                                                                                                                                                                                                                                                                                                                                                                                                                                                                                                                                                                                                                                                                                     |
| 530 | <i>vc1638_100</i> down             | Cloning at <i>dbfR</i> locus                                                   | R | CTCCAGCAAATATTGATGGATGAGATTTGGG                                                                                                                                                                                                                                                                                                                                                                                                                                                                                                                                                                                                                                                                                    |
| 628 | <i>vc1638_Real_B</i>               | <i>dbfR</i> deletion                                                           | R | GAGATTTAATTGGCATGCAACTGATACCAAGGTCTGCTCGA<br>TTATTTTTTGATGGCAG                                                                                                                                                                                                                                                                                                                                                                                                                                                                                                                                                                                                                                                     |
| 629 | <i>vc1638_Real_C</i>               | <i>dbfR</i> deletion                                                           | F | CGTGCCATCAAAAAATAATCGAGCAGACCTTGGGTATCAGTT<br>GCATGCCAATTAATCTC                                                                                                                                                                                                                                                                                                                                                                                                                                                                                                                                                                                                                                                    |
| 557 | <i>vc1638_2700</i> up              | Cloning at <i>dbfR</i> locus                                                   | F | CACCATCCGGTTTGTGCATCATGATG                                                                                                                                                                                                                                                                                                                                                                                                                                                                                                                                                                                                                                                                                         |
| 558 | <i>vc1638_2700</i> down            | Cloning at <i>dbfR</i> locus                                                   | R | GTGGCGTCAGATCCCAAACTGTTC                                                                                                                                                                                                                                                                                                                                                                                                                                                                                                                                                                                                                                                                                           |
| 650 | <i>dbfR_D51V_B</i>                 | Generating <i>dbfR<sup>DS1V</sup></i>                                          | R | CAATTTCCGTAGGCCGAGTACGAGTACGATGACGTCC                                                                                                                                                                                                                                                                                                                                                                                                                                                                                                                                                                                                                                                                              |
| 651 | <i>dbfR_D51V_C</i>                 | Generating <i>dbfR<sup>DS1V</sup></i>                                          | F | GGACGTCATCGTACTCGTACTCGGCCTACCGAAATTG                                                                                                                                                                                                                                                                                                                                                                                                                                                                                                                                                                                                                                                                              |
| 736 | <i>dbfR_SNAP_deltaS</i><br>_Gblock | Gblock for generating <i>dbfR-SNAP</i> and simultaneously deleting <i>dbfS</i> | F | CGCGGTCTTGGGTATCAGTTGCATGCCAATTCAGGAAGCGGC<br>TCAGGCAGCGGATCAGGAATGGATAAGGATTGTGAAATGAA<br>GAGAACAACCTTAGATTCCCCTACTAGGTAAATTAGAATTATCC<br>GGTTGCGAACAAGGATTACATCGTATTATATTTTTAGGAAAA<br>GGAACCAAGTGCAGCAGACGCGTAGAAGTACCAGCCCCCGCC<br>GCAGTTTTAGGAGGACCAGAACCCTAATGCAAGCCACCGCT<br>TGGTAAAACGCATATTTTCATCAACCAGAAGCCATAGAGAA<br>TTCCAGTACCAGCCCTACACCACCGTATTTCACCAAGAA<br>TCATTTACGAGACAAGTATTATGGAAATTATAAAAGTCGTC<br>AAATTCGGAGAAGTTATCAGCTATAGTCACCTAGCCGCTCTT<br>GCCGGTAATCCAGCAGCCACTGCCGAGTTAAAACCGCATT<br>TCAGGTAACCCAGTCCCATATTAATTCATGCCATAGAGTAG<br>TACAAGGAGATTTAGACGTCGGCGGATATGAAGGAGGTTTAG<br>CAGTTAAAGAATGGTTACTAGCACATGAAGGACATAGATTAG<br>GTAAACCAAGGATTAGGTTAAATGCGGTGCAAAAAACGGATTT<br>CAGTTGC |
| 734 | <i>dbfR_R</i>                      | Generating <i>dbfR-SNAP</i> and deleting <i>dbfS</i>                           | R | TTGGCATGCAACTGATACCCAAGACCGCG                                                                                                                                                                                                                                                                                                                                                                                                                                                                                                                                                                                                                                                                                      |
| 735 | <i>dbfS_down_F</i>                 | Generating <i>dbfR-SNAP</i> and deleting <i>dbfS</i>                           | F | ATGCGGTGCAAAAACGGATTTTCAGTTGC                                                                                                                                                                                                                                                                                                                                                                                                                                                                                                                                                                                                                                                                                      |
| 672 | <i>SNAP_UnivR</i>                  | Generating <i>dbfR-SNAP</i>                                                    | R | TTAACCTAATCCTGGTTTACCTAATCTATGCTTTCATGTGCT<br>AGTAACC                                                                                                                                                                                                                                                                                                                                                                                                                                                                                                                                                                                                                                                              |
| 718 | <i>dbfR_SNAP_E</i>                 | Generating <i>dbfR-SNAP</i>                                                    | F | GACATAGATTAGGTTAAACCAAGGATTAGGTTAAGATGTGATCA<br>AAACTGTGCGCGGTC                                                                                                                                                                                                                                                                                                                                                                                                                                                                                                                                                                                                                                                    |

|     |                                          |                                         |   |                                                                                                                                                                                                                                                                                                                                                                                                                     |
|-----|------------------------------------------|-----------------------------------------|---|---------------------------------------------------------------------------------------------------------------------------------------------------------------------------------------------------------------------------------------------------------------------------------------------------------------------------------------------------------------------------------------------------------------------|
| 634 | <i>cdgI_3000up</i>                       | Cloning at <i>cdgI</i> locus            | F | CGATGCAAGTAGCTGAACAAGCAC                                                                                                                                                                                                                                                                                                                                                                                            |
| 635 | <i>cdgI_2700up</i>                       | Cloning at <i>cdgI</i> locus            | F | GAATACATTGACGCCGAGCGCTTTG                                                                                                                                                                                                                                                                                                                                                                                           |
| 636 | <i>cdgI_100up</i>                        | Cloning at <i>cdgI</i> locus            | F | GGGAGCAACTTCACTGTATTCAATGAGTG                                                                                                                                                                                                                                                                                                                                                                                       |
| 637 | <i>cdgI_B</i>                            | <i>cdgI</i> deletion                    | R | GATGCGATCATCATGAGCTACCTATTTTTGTAAAGGCCCGAC<br>TTCATTTTTTCTACTCTC                                                                                                                                                                                                                                                                                                                                                    |
| 638 | <i>cdgI_C</i>                            | <i>cdgI</i> deletion                    | F | GAGAGTAGAAAAAATGAAGTCGGGCTTACAAAAATAGGT<br>AGCTCATGATGATCGCATC                                                                                                                                                                                                                                                                                                                                                      |
| 639 | <i>cdgI_100down</i>                      | Cloning at <i>cdgI</i> locus            | R | GGTCAGCAGCTTTTGCAGCACTTTATTG                                                                                                                                                                                                                                                                                                                                                                                        |
| 640 | <i>cdgI_2700down</i>                     | Cloning at <i>cdgI</i> locus            | R | GAGGTGCAACCTGCGTGTAAGTGGATTTTC                                                                                                                                                                                                                                                                                                                                                                                      |
| 641 | <i>cdgI_3000down</i>                     | Cloning at <i>cdgI</i> locus            | R | CCAGTGAGGCTATCAATATGCGCATC                                                                                                                                                                                                                                                                                                                                                                                          |
| 642 | <i>cdgG_3000up</i>                       | Cloning at <i>cdgG</i> locus            | F | GTGTCGATTCCAGCGACAAGTGCCAATTTG                                                                                                                                                                                                                                                                                                                                                                                      |
| 643 | <i>cdgG_2700up</i>                       | Cloning at <i>cdgG</i> locus            | F | GAATACACCGCAGAGCCGATAGTGAC                                                                                                                                                                                                                                                                                                                                                                                          |
| 644 | <i>cdgG_100up</i>                        | Cloning at <i>cdgG</i> locus            | F | GATAAATGCTGCCAGTCGGCATAAACACTGAG                                                                                                                                                                                                                                                                                                                                                                                    |
| 645 | <i>cdgG_B</i>                            | <i>cdgG</i> deletion                    | R | GCACAAATTAATAGTTAATTAGCTTAAATATTAATCAGACTG<br>GATAGTTGAGGATCAATCCTGATCC                                                                                                                                                                                                                                                                                                                                             |
| 646 | <i>cdgG_C</i>                            | <i>cdgG</i> deletion                    | F | GGATCAGGATTGATCCTCAACTATCCAGTCTGATTAATATTTA<br>AGCTAATTAATACTATTAATTTGTGC                                                                                                                                                                                                                                                                                                                                           |
| 647 | <i>cdgG_100down</i>                      | Cloning at <i>cdgG</i> locus            | R | TTGAGGCCATGCTAGAGCATGATGTTGAGC                                                                                                                                                                                                                                                                                                                                                                                      |
| 648 | <i>cdgG_2700down</i>                     | Cloning at <i>cdgG</i> locus            | R | CCAGTAAATTCGGGTTATGAGGTAAGGATG                                                                                                                                                                                                                                                                                                                                                                                      |
| 649 | <i>cdgG_3000down</i>                     | Cloning at <i>cdgG</i> locus            | R | GATCGCCACTTTCCGCGATTGGATG                                                                                                                                                                                                                                                                                                                                                                                           |
| 105 | BBC1881                                  | Cloning at <i>vc1807</i> locus          | F | TTAAAGGGGATCAGTGACCG                                                                                                                                                                                                                                                                                                                                                                                                |
| 106 | BBC1882                                  | Cloning at <i>vc1807</i> locus          | R | CAATTTGCTTTTGACCATCCC                                                                                                                                                                                                                                                                                                                                                                                               |
| 270 | <i>1807_2700up</i>                       | Cloning at <i>vc1807</i> locus          | F | GGCCGGCACTTTGATTACAATC                                                                                                                                                                                                                                                                                                                                                                                              |
| 271 | <i>1807_2700down</i>                     | Cloning at <i>vc1807</i> locus          | R | GTCTATATCAGAGCGCTTAAAGAGCG                                                                                                                                                                                                                                                                                                                                                                                          |
| 721 | <i>P<sub>BAD</sub>-1807_Univ_B</i>       | Generating <i>P<sub>BAD</sub>-dbfS</i>  | R | CATTTACACCTCTGCAGGTAC                                                                                                                                                                                                                                                                                                                                                                                               |
| 722 | <i>P<sub>BAD</sub>-dbfS-1807_C</i>       | Generating <i>P<sub>BAD</sub>-dbfS</i>  | F | GTACCTGCAGGAGGTGTGAAATGGGTATCAGTTGCATGCCAA<br>TTAAATCTCG                                                                                                                                                                                                                                                                                                                                                            |
| 723 | <i>P<sub>BAD</sub>-dbfS-1807_D</i>       | Generating <i>P<sub>BAD</sub>-dbfS</i>  | R | GTCGACGGATCCCCGGAATTTAATGGGATTGACGGCTTTGG<br>CTG                                                                                                                                                                                                                                                                                                                                                                    |
| 232 | ABD123                                   | Generating <i>P<sub>BAD</sub>-dbfS</i>  | F | ATTCGGGGATCCGTCGAC                                                                                                                                                                                                                                                                                                                                                                                                  |
| 729 | <i>P<sub>BAD</sub>-lapG-1807_C</i>       | Generating <i>P<sub>BAD</sub>-lapG</i>  | R | GTACCTGCAGGAGGTGTGAAATGAAACGTTGGATTGTGCTGT<br>CTCTGG                                                                                                                                                                                                                                                                                                                                                                |
| 730 | <i>P<sub>BAD</sub>-lapG-1807_D</i>       | Generating <i>P<sub>BAD</sub>-lapG</i>  | F | GTCGACGGATCCCCGGAATCTACTCATCATAGCTAACTAGAG<br>G                                                                                                                                                                                                                                                                                                                                                                     |
| 731 | <i>P<sub>BAD</sub>-rbmB-1807_C</i>       | Generating <i>P<sub>BAD</sub>-rbmB</i>  | R | GTACCTGCAGGAGGTGTGAAATGCTGTTATACTTAAATCAAT<br>TCAATAAAGAGGGTGG                                                                                                                                                                                                                                                                                                                                                      |
| 732 | <i>P<sub>BAD</sub>-rbmB-1807_D</i>       | Generating <i>P<sub>BAD</sub>-rbmB</i>  | F | GTCGACGGATCCCCGGAATCAATCTTTAATAAAGTGCTGTA<br>TATAATAATGGTCCG                                                                                                                                                                                                                                                                                                                                                        |
| 724 | <i>P<sub>BAD</sub>-cheY3-1807_Gblock</i> | Generating <i>P<sub>BAD</sub>-cheY3</i> | F | GTACCTGCAGGAGGTGTGAAATGGAGGCAATTTTGAATAAA<br>AACATGAAGATCCTTATTGTTGATGACTTTTCAACAATGCGC<br>CGAATCGTTAAAAACCTACTTCGAGATCTGGGGTTCAATAAC<br>ACGAGGAAGCGGACGATGGCCTAACGGCATTGCCTATGCTC<br>AAGAAAGGTGATTTTGACTTTGTAGTCACAGACTGGAATATG<br>CCCGGTATGCAAGGTATTGACTTGCTTAAAAATATCCGTGCC<br>GACGAAGAACTGAAGCACCTGCTGTACTAATGATCACAGCA<br>GAAGCAAACGTGAGCAAATCATCGAAGCCGCTCAAGCAGG<br>CGTGAATGGTTACATCGTAAAACCATTACCCTGCTACGCT |

|     |                            |                                                         |   |                                                                          |
|-----|----------------------------|---------------------------------------------------------|---|--------------------------------------------------------------------------|
|     |                            |                                                         |   | TAAAGAAAAATTAGACAAAATTTTGAGCGTTTATAAATTCC<br>GGGGATCCGTCGAC              |
| 587 | <i>tagA_3000up</i>         | Cloning at <i>tagA</i> locus                            | F | GGGCTGCAAGAAGCTGGATCTGCTAC                                               |
| 588 | <i>tagA_2700up</i>         | Cloning at <i>tagA</i> locus                            | F | GAGCAAAATTACAAGCTCGATCTTCAGCTAAG                                         |
| 662 | <i>tagA_103bpD_B</i>       | Removes first 103 codons of <i>tagA</i> including start | R | GTCAAATACTGGTCGTTACTGGATGTTGCATTCTTTAACAAA<br>AAAATAAAGACAAGGGAAACGTATTG |
| 663 | <i>tagA_103bpD_C</i>       | Removes first 103 codons of <i>tagA</i> including start | F | CAATACGTTTCCCTTGTCTTTATTTTTTTGTTAAAGAATGCAA<br>CATCCAGTAACGACCAGTATTTGAC |
| 591 | <i>tagA_2700down</i>       | Cloning at <i>tagA</i> locus                            | R | CCACCGAGGATACCATCCATCTTGATAATATG                                         |
| 592 | <i>tagA_3000down</i>       | Cloning at <i>tagA</i> locus                            | R | CTCTTGCCATCCATATGACATGATGTCTTTTG                                         |
| 593 | <i>tagA_100up</i>          | Cloning at <i>tagA</i> locus                            | F | GTGTGGCTTCATCCATTGACCTCCAATG                                             |
| 594 | <i>tagA_100down</i>        | Cloning at <i>tagA</i> locus                            | R | CCACTGCGAAATTAATTTTAGGATCAGCTTTAGC                                       |
| 664 | <i>tagA_150down</i>        | Cloning at <i>tagA</i> locus                            | R | GCAACCATACATCTTCCATTACTACCATAAGAG                                        |
| 519 | Arbitrary Primer           | Transposon localization                                 | F | GGCCACGCGTCGACTAGTACNNNNNNNNNAGAG                                        |
| 520 | <i>Tn5</i> specific Primer | Transposon localization                                 | R | GAAGCCCTTAGAGCCTCTC                                                      |
| 521 | Arbitrary PCR cleanup      | Transposon localization                                 | F | AGGAACACTTAACGGCTGAC                                                     |
| 522 | Arbitrary PCR cleanup      | Transposon localization                                 | R | GGCCACGCGTCGACTAGTAC                                                     |

**Movie S1 (separate file).** Representative time-lapse images of WT *V. cholerae* undergoing biofilm dispersal. Also shown are the phenotypes of mutants identified in a screen for strains defective in dispersal. The mutant categories are designated by color: signal transduction, blue; matrix degradation, green; motility, red.

## SI References

1. E. A. Groisman, The pleiotropic two-component regulatory system PhoP-PhoQ. *Journal of Bacteriology* **183**, 1835–1842 (2001).
2. L. R. Prost, M. E. Daley, M. W. Bader, R. E. Klevit, S. I. Miller, The PhoQ histidine kinases of *Salmonella* and *Pseudomonas* spp. are structurally and functionally different: evidence that pH and antimicrobial peptide sensing contribute to mammalian pathogenesis. *Mol Microbiol* **69**, 503–519 (2008).
